# Supplementary material
Source: Springer Nature journal article supplement (https://www.springermedizin.de/resource/supplementary/12879_2008_873_MOESM1_ESM.pdf/9449538)
Supplement: MOESM1 [file 9449538]

549 adults who started  
ART

126 died  
79 transferred out  
46 lost to follow-up  
27 stopped treatment

271 adults on ART alive  
and in care

50 on ART <6 months  
3 on second-line ART  
6 unable to obtain viral  
load

212 obtained viral load

187 with viral load  
<400 copies/ml

25 with viral load  
>400 copies/ml
